# Supplementary material for: Clinical features, efficacy, and safety of antiviral drugs in children with influenza A and B: A retrospective cohort study
Source: Research Square preprint supplement (doi:10.21203/rs.3.rs-6168234/v1), 2025-03-11
Supplement: Supplementary file 1 [file c26c9fa18fcac372b61d8574.docx]

Table S1. Antiviral drug use according to age group.

| **Age Group** | **Oseltamivir**  **(n = 1858)** | **Baloxavir marboxil**  **(n = 618)** | **Peramivir**  **(n = 1242)** | **Chi-square Value** | **P-value** |
| --- | --- | --- | --- | --- | --- |
| Under 5 years | 1044(56.2%) | 8(1.3%) | 740(59.6%) | 656.516 | 0.000 |
| 5–12 years | 740(39.8%) | 492(79.6%) | 452(36.4%) | 355.849 | 0.000 |
| Above 12 years | 74(4.0%） | 118(19.1%) | 50(4.0%) | 192.917 | 0.000 |

Table S2. Application of different antiviral drugs to treat complications.

|  | **Oseltamivir (n = 1858)** | **Baloxavir marboxil (n = 618)** | **Peramivir (n = 1242)** | **Chi-square Value** | **P-value** |
| --- | --- | --- | --- | --- | --- |
| Pneumonia | 34(1.8%) | 31(5.0%) | 197(15.9%) | 228.416 | 0.000 |
| Bronchitis | 58(3.1%) | 18(2.9%) | 88(7.1%) | 31.684 | 0.000 |
| Convulsions | 38(2.0%） | 6(1.0%) | 83(6.7%) | 61.957 | 0.000 |

Table S3. Efficacy of different antiviral drugs against influenza A before propensity score matching.

|  | **Oseltamivir**  **n = 934** | **Baloxavir marboxil**  **n = 223** | **Peramivir**  **n = 560** | **Statistical value** | **P-value** |
| --- | --- | --- | --- | --- | --- |
| Time to Fever Resolution (d) | 2.15(2.08,2.22) | 1.61(1.48,1.75) | 1.75(1.66,1.85) | 34.564 | 0.000 |
| Recovery Time (d) | 7.01(6.90,7.13) | 6.62(6.28,6.97) | 6.75(6.60,6.90) | 5.322 | 0.005 |

Table S4. Efficacy of different antiviral drugs against influenza B before propensity score matching.

|  | **Oseltamivir**  **n = 924** | **Baloxavir marboxil**  **n=395** | **Peramivir**  **n = 682** | **Statistical value** | **P-value** |
| --- | --- | --- | --- | --- | --- |
| Time to Fever Resolution (d) | 2.19(2.11,2.27) | 1.55(1.46,1.64) | 1.79(1.72,1.86) | 57.137 | 0.000 |
| Recovery Time (d) | 7.03(6.90,7.16) | 6.76(6.57,6.96) | 6.86(6.73,6.99) | 3.305 | 0.037 |
